# Supplementary material for: Control of metal–support interaction for tunable CO hydrogenation performance over Ru/TiO2 nanocatalysts
Source: Royal Society of Chemistry journal article supplement (doi:10.1039/d3nr06208b), 2024-01-01
Supplement: d3nr06208b1.pdf [file d3nr06208b1.pdf]

## Supporting Information

### **Control of metal-support interaction for tunable CO hydrogenation performance over Ru/TiO<sub>2</sub> nanocatalysts**

Heyun Lin<sup>1,2,3</sup>, Wenzhe Zhang<sup>3</sup>, Huachen Shen<sup>1,2</sup>, Hailing Yu<sup>1,2</sup>, Yunlei An<sup>1</sup>, Tiejun Lin<sup>1,2,\*</sup> and Liangshu Zhong<sup>1,2,3,\*</sup>

<sup>1</sup> Key Laboratory of Low-Carbon Conversion Science and Engineering, Shanghai Advanced Research Institute, Chinese Academy of Sciences, Shanghai, 201210, China

<sup>2</sup> University of the Chinese Academy of Sciences, Beijing 100049, P. R. China;

<sup>3</sup> School of Physical Science and Technology, ShanghaiTech University, Shanghai, 201210, China

\* Corresponding authors: [lintj@sari.ac.cn](mailto:lintj@sari.ac.cn); [zhongls@sari.ac.cn](mailto:zhongls@sari.ac.cn)

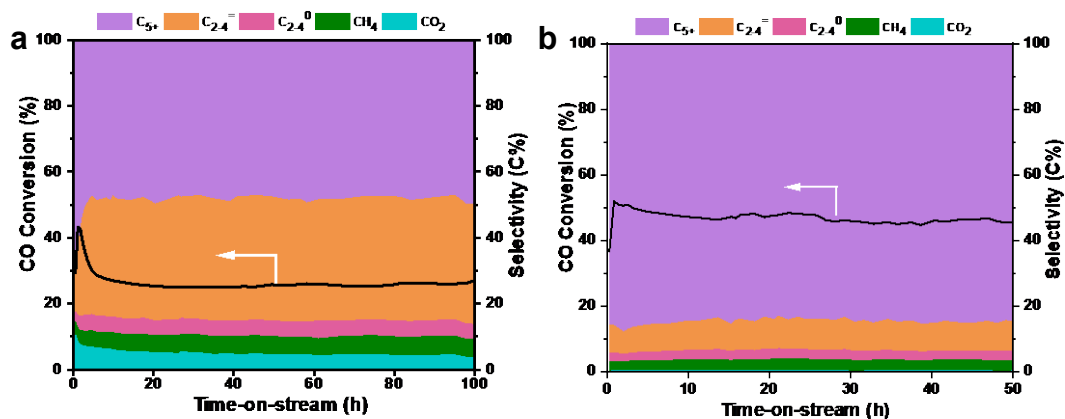

Fig. S1 The stability test of Ru/r-TiO<sub>2</sub>-300R(a) and Ru/a-TiO<sub>2</sub>(H<sub>2</sub>)-300R(b)

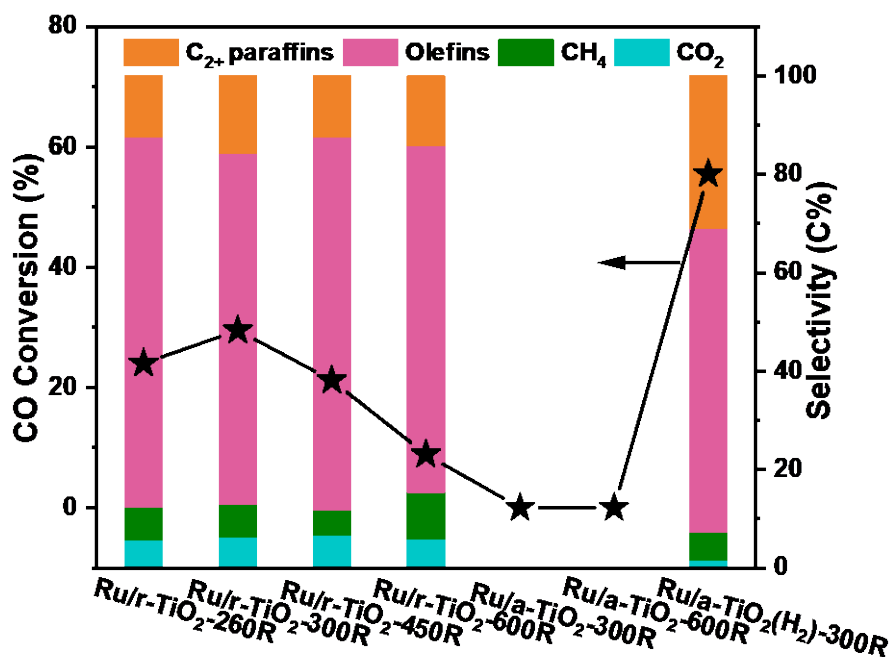

Fig. S2 Comparison of CO conversion and product selectivity of various Ru/TiO<sub>2</sub> catalysts reduced under different reaction temperatures. Reaction condition: 1 MPa, 3000 mL·g<sup>-1</sup>·h<sup>-1</sup>, H<sub>2</sub>/CO=2, 260 °C.

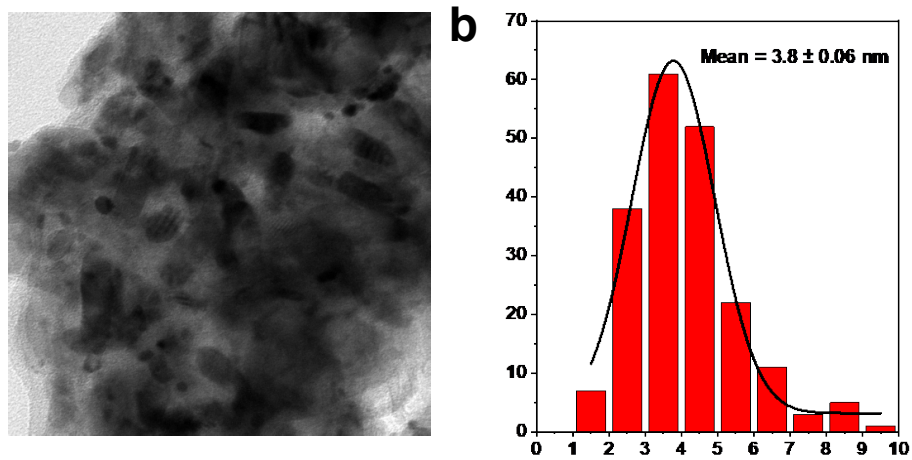

**Fig. S3** TEM images of Ru/r-TiO<sub>2</sub>-600R(a) and the corresponding particle size distribution bar charts with the Gaussian fitted curves (b).

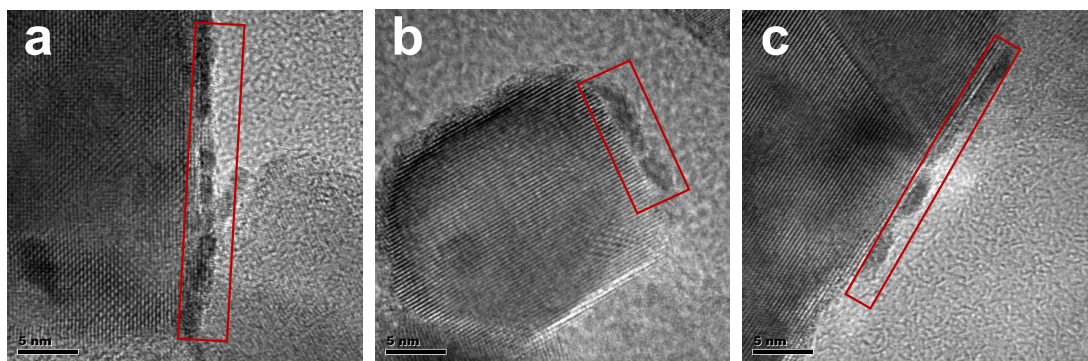

**Fig. S4** HRTEM images of Ru/r-TiO<sub>2</sub>-300R

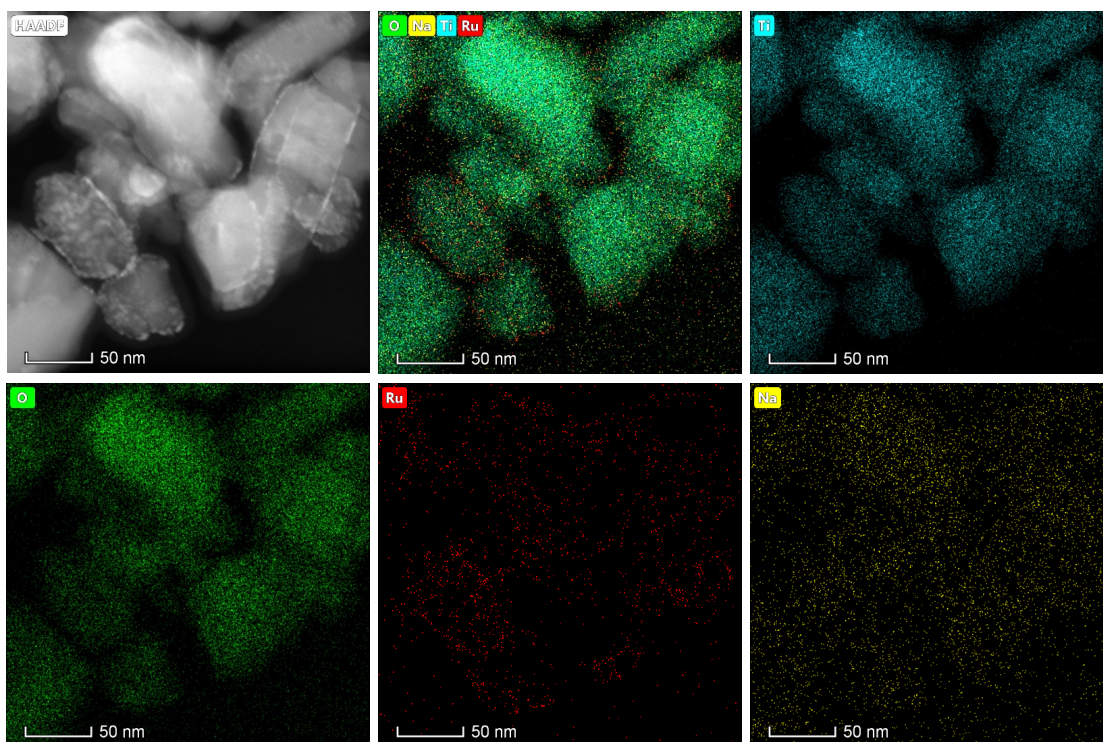

**Fig. S5** HAADF-STEM images and element mapping of Ru/r-TiO<sub>2</sub>-300R

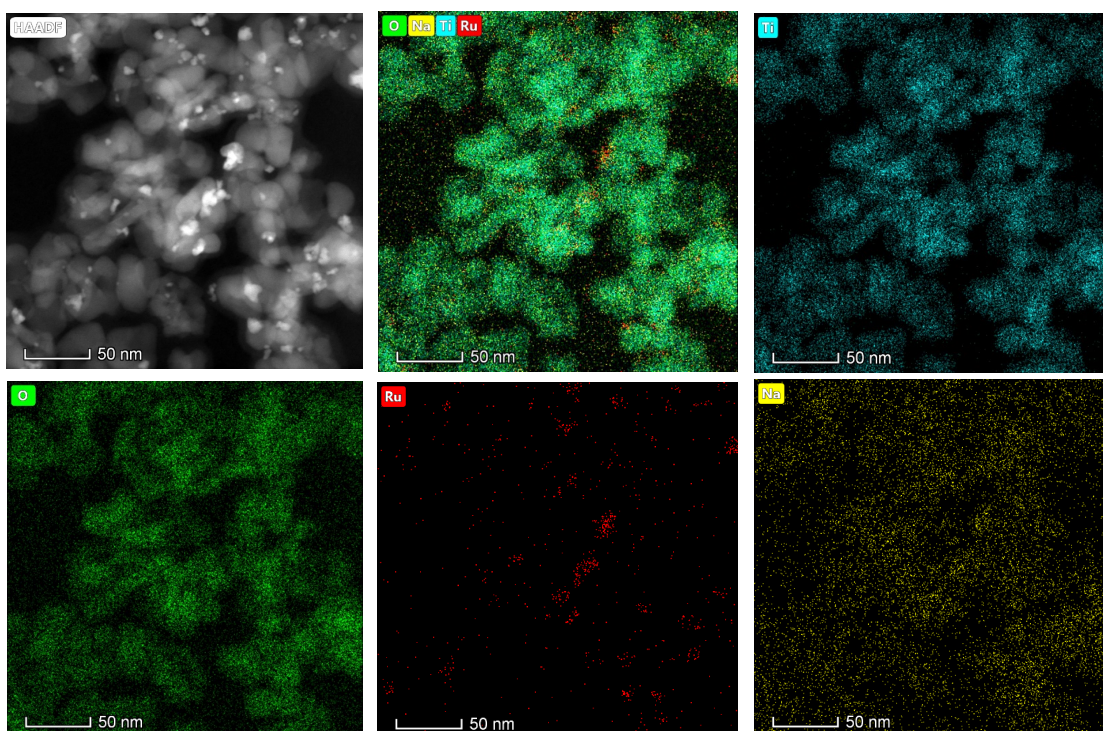

**Fig. S6** HAADF-STEM images and element mapping of Ru/a-TiO<sub>2</sub>-300R

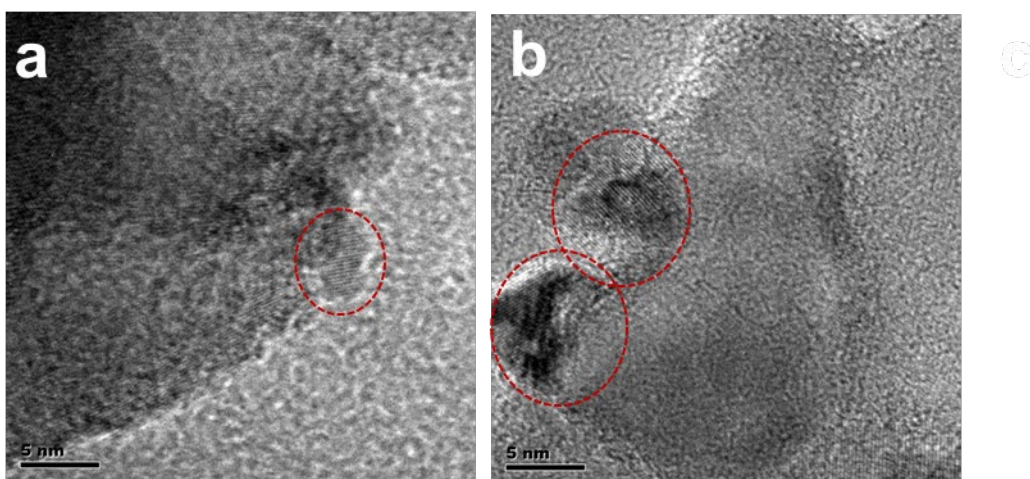

Fig. S7 HRTEM images of Ru/a-TiO<sub>2</sub>(H<sub>2</sub>)-300R

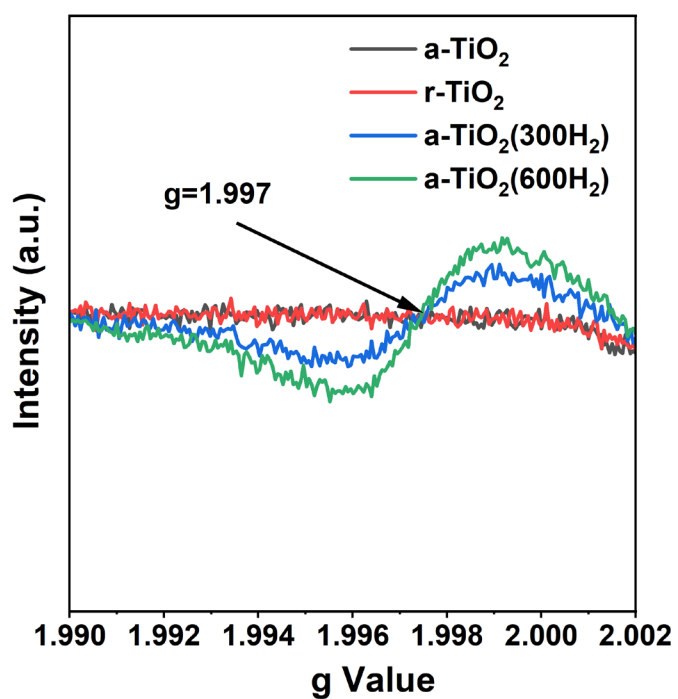

Fig.S8 Low-temperature EPR result of various TiO<sub>2</sub> support

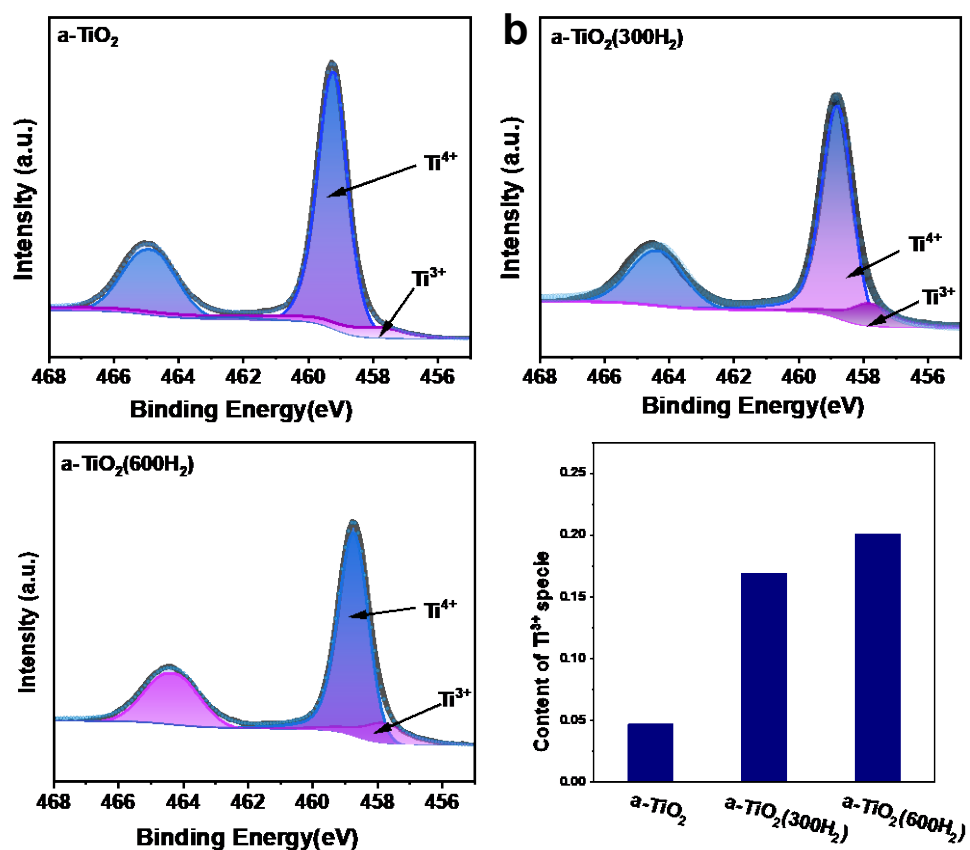

Fig. S9 Ti 2p spectra of various anayase-TiO<sub>2</sub> support (a~c) and the corresponding content of Ti<sup>3+</sup> (d)

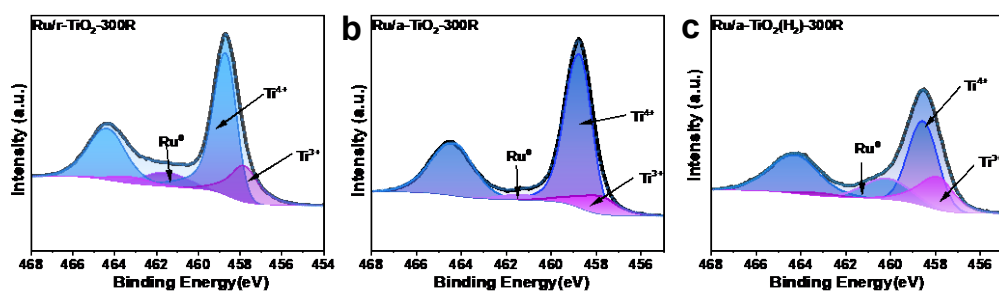

Fig. S10 XPS spectra of various reduced Ru/TiO<sub>2</sub> catalysts. (a) Ru/r-TiO<sub>2</sub>-300R; (b) Ru/a-TiO<sub>2</sub>-300R; (c) Ru/a-TiO<sub>2</sub>(H<sub>2</sub>)-300R

**Table S1** Catalytic performance of various supported catalysts.

| Entry | Sample                                         | CO Conv.<br>(%) | Selectivity (C%) |                           |                 |                 |
|-------|------------------------------------------------|-----------------|------------------|---------------------------|-----------------|-----------------|
|       |                                                |                 | Olefins          | C <sub>2+</sub> paraffins | CO <sub>2</sub> | CH <sub>4</sub> |
| 1     | 5Ru/r-TiO <sub>2</sub> -300R                   | 26.4            | 69.4             | 17.7                      | 7.0             | 5.9             |
| 2     | 2Ru/a-TiO <sub>2</sub> -300R <sup>a</sup>      | 0               | -                | -                         | -               | -               |
| 3     | 5Ru/a-TiO <sub>2</sub> -300R                   | 0               | -                | -                         | -               | -               |
| 4     | 5Ru/a-TiO <sub>2</sub> -300R(0Na) <sup>b</sup> | 0               | -                | -                         | -               | -               |
| 5     | 5Ru/a-TiO <sub>2</sub> (H <sub>2</sub> )-300R  | 55.5            | 61.9             | 30.9                      | 1.5             | 5.7             |

Reaction condition: 1 MPa, 3000 mL·g<sup>-1</sup>·h<sup>-1</sup>, H<sub>2</sub>/CO=2, 260 °C

2Ru/a-TiO<sub>2</sub>-300R<sup>a</sup>: The Ru/a-TiO<sub>2</sub> catalyst with Ru loading of 2.0 wt% and Na loading of 0.2 wt%.

5Ru/a-TiO<sub>2</sub>-300R(0Na)<sup>b</sup>: The Ru/a-TiO<sub>2</sub> catalyst with Ru loading of 5.0 wt% and Na loading of 0 wt%.
